1 **Molecular epidemiology and drug resistance patterns**  
2 **of *Mycobacterium tuberculosis* complex isolates from**  
3 **university students and the local community in**  
4 **Eastern Ethiopia**

5 Abiyu Mekonnen<sup>1\*</sup> Matthias Merker<sup>2</sup>, Jeffrey M Collins<sup>3</sup>, Desalegn Addise<sup>4</sup>, Abraham  
6 Aseffa<sup>5</sup>, Beyene Petros<sup>1#</sup>, Gobena Ameni<sup>6</sup> and Stefan Niemann<sup>2,7</sup>

7  
8 <sup>1</sup>Department of Microbial, Cellular and Molecular Biology, Addis Ababa University,  
9 Ethiopia

10 #Email: [abule2002@yahoo.com](mailto:abule2002@yahoo.com)

11 <sup>2</sup>Molecular Mycobacteriology, Research Center Borstel, Borstel, Germany

12 Email: [mmerker@fz-borstel.de](mailto:mmerker@fz-borstel.de)

13 <sup>3</sup>Division of Infectious Diseases, Department of Medicine, Emory University School of  
14 Medicine, Atlanta, Georgia

15 Email: [Jeffrey.michael.collins@emory.edu](mailto:Jeffrey.michael.collins@emory.edu)

16 <sup>4</sup>Ethiopian National Tuberculosis Reference laboratory, Ethiopian Public Health  
17 Institute, Addis Ababa, Ethiopia

18 Email: [desalegnaddise@gmail.com](mailto:desalegnaddise@gmail.com)

19 <sup>5</sup>Armauer Hansen Research Institute, Addis Ababa, Ethiopia

20 Email: [aseffaa@gmail.com](mailto:aseffaa@gmail.com)

21 <sup>6</sup>Aklilu Lemma Institute of Pathobiology, Addis Ababa University, Ethiopia

22 Email: [gobenachimdi2009@yahoo.co.uk](mailto:gobenachimdi2009@yahoo.co.uk)

23 <sup>7</sup>German Center for Infection Research, Partner Site Borstel, Borstel, Germany

24 Email: [sniemann@fz-borstel.de](mailto:sniemann@fz-borstel.de)

25

26 **Short title:** Molecular epidemiology and drug resistance patterns of *M. tuberculosis* in  
27 eastern Ethiopia

28 \*Address correspondence to: Abiyu Mekonnen, [abiyumg@yahoo.com](mailto:abiyumg@yahoo.com); Po-box: 11422,  
29 Addis Ababa, Ethiopia

30

31

32

33

34

35

36

37

38

39

40

41

42

43

44

45

46

## 47 **Abstract**

48 **Background:** Previous studies suggest the burden of pulmonary tuberculosis (PTB) in  
49 Ethiopia may be greater in university students relative to the overall population. However,  
50 little is known about the transmission dynamics of PTB among students and members of  
51 the communities surrounding university campuses in Eastern Ethiopia.

52 **Methods:** A cross sectional study was conducted in Eastern Ethiopia among culture-  
53 confirmed PTB cases from university students (n=36) and community members  
54 diagnosed at one of four hospitals (n=152) serving the surrounding area. Drug  
55 susceptibility testing (DST) was performed on Mycobacterium Tuberculosis Complex  
56 (MTBC) isolates using BD Bactec MGIT 960 and molecular genotyping was performed  
57 using spoligotyping and 24-loci MIRU-VNTR. MTBC strains with identical genotyping  
58 patterns were assigned to molecular clusters as surrogate marker for recent transmission  
59 and further contact tracing was initiated among clustered patients.

60 **Results:** Among all study participants, four MTBC lineages and 11 sub-lineages were  
61 identified, with Ethiopia\_3 being most common sub-lineage (29.4%) and associated with  
62 strain clustering (P= 0.016). We identified 13 (8.1%) strains phylogenetically related to  
63 the known Ethiopian sub-lineages with a distinct Spoligotyping patterns and designated  
64 as Ethiopia\_4. The clustering rate of MTB strains was 52.9% for university students and  
65 66.7% for community members with a Recent Transmission Index (RTI) of 17.6% and  
66 48.4%, respectively. Female gender, urban residence, and new TB cases were  
67 significantly associated with strain clustering (p<0.05). Forty-eight (30%) of the study  
68 participants were resistant to one or more first line anti TB drugs, three patients were  
69 classified as multidrug resistant (MDR), defined by isoniazid and rifampicin resistance.

70 **Conclusion:** We found evidence of significant PTB cases clustering and recent  
71 transmission among Ethiopian university students and the local community in eastern  
72 Ethiopia; with Ethiopia\_3 being the predominant circulating sub-lineage. A country wide  
73 comprehensive molecular surveillance and drug resistance profiling of MTBC strains and  
74 Implementation of TB control programs within universities and the surrounding community  
75 should be considered to decrease TB transmission.

76 **Key words:** 24-loci MIRU-VNTR, Ethiopia\_3 sub lineage, University students, MTBC clustering  
77 rate, Ethiopia

78

79

80

81

82

83

84

85

86

87

88

89

90

91

## 92 **Background**

93 Tuberculosis (TB) remains a major threat to public health worldwide [1], with an  
94 estimated 10.4 million cases in 2016 [2]. Ethiopia is one of the fourteen countries with  
95 the highest TB burden with an annual incidence rate of 177/100,000 population [2].  
96 Young adults in Ethiopia have a higher TB incidence than any other age group [3], which  
97 has a negative impact on the country's socio-economic development [4]. Halting TB  
98 transmission and decreasing TB incidence rates, especially in young adults, will be an  
99 essential component of the public health program in Ethiopia. However, in communities  
100 of young adults, such as university students, little is known about recent PTB infection  
101 rates and the primary drivers of TB transmission. These communities offer an opportunity  
102 for interrupt transmission with infection control measures such as TB screening and  
103 contact tracing.

104 Molecular strain typing (genotyping), namely 24-loci Mycobacterial Interspersed  
105 Repetitive Units-Variable Number Tandem Repeat (MIRU-VNTR) technique in  
106 combination with Spacer Oligo Nucleotide typing (Spoligotyping), is widely used to  
107 investigate local transmission dynamics and evaluate TB control programs [5,6,7]. In  
108 addition, certain MTBC lineages (e.g. lineage 2 [Beijing]) have been associated with  
109 increased pathogenicity and resistance to specific drugs, which increase the risk of drug  
110 resistant MTBC strains in a region [8].

111 Recent studies on university students in central Ethiopia suggested TB incidence  
112 to be much higher on school campuses relative to surrounding communities [9]. Rapid  
113 increases in university enrollment in Ethiopia has led to crowded congregate living  
114 environments on college campuses with the potential to facilitate TB transmission.

115 However, the relative contribution of recent TB transmission, both on campus and in the  
116 surrounding community, to active TB disease among Ethiopian university students is  
117 unknown. We studied university students and surrounding community members  
118 diagnosed with pulmonary TB at three universities and four hospitals in eastern Ethiopia  
119 to determine the genotypic characteristics, transmission dynamics and drug resistance  
120 patterns of MTBC strains circulating in the region.

121

122

123

124

125

126

127

128

129

130

131

132

## 133 **Materials and Methods**

### 134 **Study design and period**

135           A cross-sectional study was conducted among students of three Eastern Ethiopian  
136 universities and members of the surrounding community diagnosed with pulmonary  
137 tuberculosis (PTB). Inclusion criteria was a positive sputum culture for MTBC. Students  
138 with PTB were identified through active case finding between May 2016 and April 2017;  
139 community TB cases were enrolled from hospitals serving the geographic areas  
140 surrounding the universities from January to April 2017. Participants for whom a valid  
141 genotype could not be obtained were excluded from the study. This included evidence of  
142 a mixed infection or laboratory cross-contamination as indicated by double alleles at two  
143 or more loci during MIRU/VNTR typing and two or more loci with missing data following  
144 at least two independent PCR amplifications. Reasons for missing loci included  
145 insufficient DNA concentration [10] and nucleotide polymorphisms in the sequence  
146 complementary to the PCR primers [11].

### 147 **Study sites**

148           The study comprises three regional states and one administration (Oromia, Somali  
149 and Harari regional states and Dire Dawa City administration). The towns where the study  
150 hospitals were located are: Harar (Harari region), Haramaya (Haramaya district, Oromia  
151 region), Dire Dawa (Dire Dawa city administration) and Jigjiga (Somali region). According  
152 to the Central Statistical agency of Ethiopian population projection values of 2017, the  
153 population of Harari and Somali regional states were 246,000 and 5,748,998,  
154 respectively; whereas that of Dire Dawa city administration and Haramaya district were

155 466,000 and 361,787, respectively [12]. The universities studied were Haramaya  
156 University, Dire Dawa University and Jigjiga University.

## 157 Collection of MTBC strains

158 **Students:** All full-time students attending Haramaya University, Dire Dawa  
159 University and Jigjiga University were screened for PTB by active case finding through  
160 dormitory-to-dormitory visits using WHO TB screening document [13] between May 2016  
161 and April 2017. Two spot sputum samples were collected from students with a positive  
162 WHO symptom screen. One sputum sample was processed for Acid Fast Bacilli (AFB)  
163 sputum smear microscopy and the other one was transported to Harari Health Research  
164 and Regional Laboratory, Harar, Ethiopia for MTB culture. Thirty-six student AFB cultures  
165 were positive for MTBC and genotype analysis was performed on all isolates.

166 **Local community:** Persons diagnosed with PTB from the community  
167 surrounding the universities studied were enrolled at four hospitals: Haramaya district  
168 hospital (Haramaya), Hiwot Fana specialized university hospital (Harar), Dil Chora  
169 hospital (Dire Dawa) and Karamara hospital (Jigjiga). Persons presenting to these  
170 facilities with symptoms of PTB and found to have a positive AFB sputum smear between  
171 January and April 2017 were approached for study enrollment. Persons giving consent  
172 for study participation were administered a standard questionnaire to collect information  
173 about relevant clinical and sociodemographic data. An early morning sputum sample was  
174 collected from the respective smear positive patient and stored at -20°C until transported  
175 to Harari Health Research and Regional Laboratory for TB culture. Initially 171 sputum  
176 samples were collected from smear positive PTB cases from the four hospitals, of which  
177 19 (11.3%) samples were excluded due to growth of contaminating flora.



178

## 179 Laboratory methods

180 Sputum samples were collected from students with a positive symptom screen and  
181 community members with symptoms and a positive AFB sputum. All specimens were  
182 cultivated on LJ (BBL™ Lowenstein-Jensen) media at Harari Health Research and  
183 Regional laboratory following the standard operational procedures. Isolates on LJ  
184 transported to the National TB reference laboratory, Addis Ababa, were reactivated and  
185 phenotypic Drug Susceptibility Testing (DST) was performed using the MGIT SIRE kit at  
186 a critical concentration of streptomycin (STM) 1 µg, Isoniazid (INH) 0.1 µg, Rifampicin  
187 (RIF) 1 µg and Ethambutol (EMB) 5 µg on liquid Mycobacterium Growth Indicator Tube  
188 system (MGIT) 960 as described by the manufacturer [\[14\]](#).

189 DNA from MTBC isolates were extracted and transported to Borstel Molecular  
190 Mycobacteriology laboratory, Germany for genotype analysis. Molecular characterization  
191 of all isolates was conducted using Spoligotyping [\[15\]](#) and 24- loci MIRU-VNTR  
192 customized kits (Genoscreen, Lilli, France) [\[16\]](#). Spoligotypes common to more than one  
193 strain were designated as shared types (ST) and were assigned a shared international  
194 type number (SIT) according to the international spoligotype database SpoIDB4 [\[17\]](#).  
195 Basic strain classification and MLVA MTBC 15–9 nomenclature assignment was done  
196 using the MIRUVNTRplus database [\[18\]](#). Samples with complete spoligotyping and  
197 MIRU/VNTR-24 results were used for clustering analysis. A cluster was defined as two or  
198 more MTBC isolates sharing identical 24-loci MIRU/VNTR and spoligotyping patterns.  
199 Samples with no PCR amplicon at only one locus in the 24-loci MIRU/VNTR analysis  
200 were included for further analysis by considering missing data at the respective locus [\[19\]](#).

## 201 Data analysis

202 MTBC genotypes were classified in a phylogenetic tree (based on 24-loci MIRU-  
203 VNTR profiles) in relation to a MTBC reference collection hosted on the MIRU-VNTRplus  
204 website (available at [www.miru-vntrplus.org](http://www.miru-vntrplus.org)) and considering genotype specific  
205 Spoligotyping patterns [18]. Minimum Spanning Trees (MST) were calculated with  
206 BioNumerics (Version 7.5; Applied Maths, Sint-Martens-Latem, Belgium) as  
207 recommended by the manufacturer (available at <http://applied-maths.com>). A  
208 dendrogram was generated using the Unweighted Pair Group Method with Arithmetic  
209 averages (UPGMA) based on the 24-loci MIRU-VNTR profiles. The UPGMA tree was  
210 further processed using EvolView, an online visualization and management tool for  
211 customized and annotated phylogenetic trees [20] (Fig 1). The Recent Transmission  
212 Index (RTI) was calculated as number of clustered patients minus number of clusters  
213 divided by total number of patients.

214 Data were entered and analyzed using IBM SPSS version 23 statistical package  
215 software. Logistic regression was used to estimate the strength of association between  
216 strain clustering and different variables. A Chi-square test was used for bivariate analysis  
217 of categorical variables. P-values <0.05 were considered as statistically significant.  
218 Those factors significantly associated with clustering in the univariate analysis were  
219 included in the multivariate regression model.

## 220 Ethical Considerations

221 The study was ethically reviewed and approved by Addis Ababa University,  
222 College of Natural Sciences Research Ethics Review Board. Written informed consent

223 that included information about the risks and benefits of the study was a prerequisite for  
224 all university students and local community study participants.

225

## 226 Results

### 227 Study population

228 We enrolled 188 study participants with PTB, all of whom were sputum culture  
229 positive for MTBC. Molecular genotyping was performed on all isolates using  
230 Spoligotyping and MIRU/VNTR-24 loci techniques. Of these, 28 isolates were excluded  
231 for technical reasons; two were found to be a mixed infection as indicated by double  
232 alleles at two or more loci during MIRU/VNTR typing and 26 isolates had two or more loci  
233 missing following PCR amplification. Therefore, 160 MTBC strains were included in the  
234 final genotypic analysis: 34 from university students and 126 from the local community.  
235 The majority of the study participants were male (80%) and rural residents (60.6%). Forty-  
236 six (28.7%) of the participants had previous treatment for TB, and 10.6% were HIV-  
237 positive (Table 1).

238 Table 1. Socio-demographic and other characteristics by study participants, eastern  
239 Ethiopia, May 2016 to April 2017

| Variable |   | Students<br>n (%) | Local<br>Community<br>n (%) | Total<br>n (%) | P-value |
|----------|---|-------------------|-----------------------------|----------------|---------|
| Gender   | M | 33 (97.1)         | 95 (75.4)                   | 128 (80.0)     | 0.005   |
|          | F | 1 (2.9)           | 31 (24.6)                   | 32 (20.0)      |         |

|                    |                |           |            |            |       |
|--------------------|----------------|-----------|------------|------------|-------|
| Age group          | <18            | 0 (0)     | 16 (12.7)  | 16 (10.0)  | NA    |
|                    | 18-24          | 33 (97.1) | 27 (21.4)  | 60 (37.5)  |       |
|                    | 25-34          | 1 (2.9)   | 40 (31.7)  | 41 (25.6)  |       |
|                    | 35-44          | 0 (0)     | 23 (18.3)  | 23 (14.4)  |       |
|                    | ≥ 45           | 0(0)      | 20 (15.9)  | 20 (12.5)  |       |
| Location/Region    | Haramaya/Harar | 18 (53.0) | 46 (36.5)  | 64 (40.0)  | 0.177 |
|                    | Dire Dawa      | 6 (17.6)  | 38 (30.2)  | 44 (27.5)  |       |
|                    | Jigjiga        | 10 (29.4) | 42 (33.3)  | 52 (32.5)  |       |
| Residence          | Urban          | 3 (8.8)   | 60 (47.6)  | 63 (39.4)  | NA    |
|                    | Rural          | 31 (91.2) | 66 (52.4)  | 97 (60.6)  |       |
| Previous Rx for TB | No             | 28 (82.4) | 86 (68.3)  | 114 (71.3) | 0.107 |
|                    | Yes            | 6 (17.6)  | 40 (31.7)  | 46 (28.7)  |       |
| HIV status         | Negative       | 32 (94.1) | 111 (88.1) | 143 (89.4) | 0.614 |
|                    | Positive       | 2 (5.9)   | 15 (11.9)  | 17 (10.6)  |       |
| Clustering         | No             | 16 (47.1) | 42 (33.3)  | 58 (36.3)  | 0.140 |
|                    | Yes            | 18 (52.9) | 84 (66.7)  | 102 (63.8) |       |

240

## 241 Phylogenetic analysis of *M. tuberculosis* strains

242 The two predominant MTBC lineages in this study were lineage 4 (Euro-American,  
 243 71.3%) and lineage 3 (Delhi-CAS, 22.5%). MTBC strains classified as lineage 1 (East  
 244 African Indian), and lineage 2 (Beijing) were only identified in six and four patients,  
 245 respectively (Table 2).

246 Table 2. Phylogenetic Sub-lineages and Drug Sensitivity patterns of MTBC strains  
 247 isolated by study participants, eastern Ethiopia, May 2016 to April 2017  
 248

| Variable                |                      | Students<br>n (%)* | Local Community<br>n (%)* | P-Value |
|-------------------------|----------------------|--------------------|---------------------------|---------|
| Phylogenetic<br>Lineage | Ethiopia_3           | 10 (29.4)          | 38 (30.2)                 | 0.074   |
|                         | Ethiopia_4           | 1 (2.9)            | 12 (9.5)                  |         |
|                         | Ethiopia_H37 Rv like | 7 (20.6)           | 15 (11.9)                 |         |
|                         | Delhi/CAS            | 7 (20.6)           | 29 (23.0)                 |         |
|                         | Beijing              | 0 (0)              | 4 (3.2)                   |         |
|                         | LAM                  | 1 (2.9)            | 6 (4.8)                   |         |
|                         | Haarlem              | 1 (2.9)            | 7 (5.6)                   |         |
|                         | X-type               | 0 (0)              | 4 (3.2)                   |         |
|                         | EAI                  | 0 (0)              | 6 (4.8)                   |         |
|                         | Ugandall             | 1 (2.9)            | 0 (0)                     |         |
|                         | URAL                 | 1 (2.9)            | 1 (0.8)                   |         |
|                         | Not defined          | 5 (14.7)           | 4 (3.2)                   |         |
| Streptomycin            | S                    | 27 (79.4)          | 109 (86.5)                | 0.304   |
|                         | R                    | 7 (20.6)           | 17 (13.5)                 |         |
| Isoniazid               | S                    | 28 (82.4)          | 111 (88.1)                | 0.379   |
|                         | R                    | 6 (17.6)           | 15 (11.9)                 |         |
| Rifampin                | S                    | 34 (100)           | 117 (92.9)                | 0.109   |
|                         | R                    | 0 (0)              | 9 (7.1)                   |         |

|                                         |   |           |            |       |
|-----------------------------------------|---|-----------|------------|-------|
| Ethambutol                              | S | 34 (100)  | 117 (92.9) | 0.109 |
|                                         | R | 0 (0)     | 9(7.1)     |       |
| Resistance to $\geq 1$<br>Anti-TB drugs | S | 23 (67.6) | 89 (70.6)  | 0.734 |
|                                         | R | 11 (32.4) | 37 (29.4)  |       |
| MDR                                     | S | 34 (100)  | 123 (97.6) | 0.364 |
|                                         | R | 0 (0)     | 3 (2.4)    |       |

249 \*Percentage is calculated from column total

250 MDR: Multidrug resistant, EAI: East-African Indian; LAM: Latin American

251 Mediterranean; S: Susceptible; R: Resistance

252

253 The most prevalent MTBC genotypes within the Euro-American super-lineage  
 254 were Ethiopia\_3 (29.4%) and Ethiopia-H37Rv-like (12.8%), both previously described  
 255 among Ethiopian patients with PTB [10], and TB lymphadenitis [21]. Based on the  
 256 phylogenetic structure/topology (UPGMA- and MST-based), we further termed the third  
 257 largest monophyletic lineage 4 group “Ethiopia\_4” (8.1%) accordingly (Fig 1). Ethiopia\_4  
 258 strains are closely related to Ethiopia\_3 strains but with a distinct Spoligotyping pattern.  
 259 Both, Ethiopia\_3 and Ethiopia\_4 strains, have a shared common ancestor with TUR-  
 260 genotype strains, but with unique Spoligotyping patterns, justifying their own  
 261 nomenclature in the context of the molecular epidemiology in Ethiopia.

262

263 Fig 1. Minimum spanning tree based on MIRU/VNTR profiles of 24- loci of 160 MTBC  
 264 isolates in eastern Ethiopia. A circle representing a specific genotype is divided in to the  
 265 number of strains clustering in it.

266 MTBC strains classified as Beijing, East Africa India (EAI), or X-type were isolated  
267 exclusively from community members and not identified among university students.  
268 Particularly Beijing strains were only isolated from members of the surrounding Dire Dawa  
269 community. Nine MTBC isolates (5.6%) could not be classified within any of the known  
270 genotypes but these strains were part of lineage 4 with an unknown sub-group and are  
271 labeled “Not defined”.

272

### 273 Molecular MTBC clusters and associated risk factors

274 The overall cluster rate of MTBC strains derived from all patients was 63.8%,  
275 including 21 clusters with 2 to 22 patients. Twelve clusters contained at least one  
276 university student. The overall Recent Transmission Index (RTI) was 50.6% (Table 3). In  
277 a univariate regression model, we found the following demographic and treatment related  
278 factors associated to clustered cases: female gender ( $P=0.004$ ), urban residence  
279 ( $P=0.012$ ) and those without prior TB diagnosis of active TB disease ( $P=0.001$ ).  
280 Additionally, MTBC strains classified as Ethiopia\_3 were significantly more abundant  
281 among clustered cases compared to other MTBC genotypes/lineages (Table 4, Fig 2).

282

283 Table 3. Clustering rate and Recent Transmission Index (RTI) analysis using  
284 Spoligotyping and MIRU-VNTR 24-loci methods for local community, university students  
285 and all study participants, eastern Ethiopia, May 2016 to April 2017

| Methods | Source of MTBC isolate | No. of different patterns | Unique Patterns | Number of clusters | Number of isolates in cluster | Cluster ing Rate | RTI |
|---------|------------------------|---------------------------|-----------------|--------------------|-------------------------------|------------------|-----|
|---------|------------------------|---------------------------|-----------------|--------------------|-------------------------------|------------------|-----|

|                                   |                                   |    |    |    |     |       |       |
|-----------------------------------|-----------------------------------|----|----|----|-----|-------|-------|
| Spoligotyping                     | Students                          | 18 | 6  | 12 | 28  | 82.4% | 26.5% |
|                                   | Local community                   | 38 | 12 | 26 | 114 | 90.5% | 69.8% |
|                                   | Both students and local community | 40 | 18 | 22 | 142 | 88.7% | 75%   |
| MIRU-VNTR 24-loci                 | Students                          | 28 | 16 | 12 | 18  | 52.9% | 17.6% |
|                                   | Local community                   | 63 | 38 | 25 | 88  | 69.8% | 50%   |
|                                   | Both students and local community | 77 | 55 | 22 | 105 | 65.6% | 51.9% |
| Spoligotyping + MIRU-VNTR 24-loci | Students                          | 28 | 16 | 12 | 18  | 52.9% | 17.6% |
|                                   | Local community                   | 65 | 44 | 21 | 84  | 66.7% | 48.4% |
|                                   | Both students and local community | 79 | 58 | 21 | 102 | 63.8% | 50.6% |

286

287

288 Fig 2. Radial UPGMA tree based on MIRU/VNTR 24-loci copy number.

289

290 Table 4. Factors associated with MTBC strain clustering, eastern Ethiopia, May 2016 to

291 April 2017

| Variable |      | Genotype            |                  | AOR (95% C.I) | P-value |
|----------|------|---------------------|------------------|---------------|---------|
|          |      | Clustered<br>n (%)* | Unique<br>n (%)* |               |         |
| Gender   | Male | 75 (58.6)           | 53 (41.4)        | 1             |         |



|                        |                      |           |           |                    |       |
|------------------------|----------------------|-----------|-----------|--------------------|-------|
|                        | Female               | 27 (84.4) | 5 (15.6)  | 7.14 (1.85, 27.52) | 0.004 |
| Residence location     | Urban                | 48 (76.2) | 15 (23.8) | 4.19 (1.36, 12.89) | 0.012 |
|                        | Rural                | 54 (55.7) | 43 (44.3) | 1                  |       |
| Previous DX for TB     | No                   | 83 (72.8) | 31 (27.2) | 6.50 (2.14, 19.79) | 0.001 |
|                        | Yes                  | 19 (41.3) | 27 (58.7) | 1                  |       |
| Isoniazid              | Susceptible          | 84 (60.4) | 55 (39.6) | 1                  |       |
|                        | Resistance           | 18 (85.7) | 3 (14.3)  | 7.81 (0.75, 81.69) | 0.086 |
| Any resistance to FLDs | No                   | 62 (55.4) | 50 (44.6) | 1                  |       |
|                        | Yes                  | 40 (83.3) | 8 (16.6)  | 3.23 (0.80, 13.01) | 0.100 |
| Genotype               | Ethiopia_3           | 41 (87.2) | 7 (12.8)  | 13.37 (1.63,109.6) | 0.016 |
|                        | Ethiopia_4           | 7         | 6         | 1.11 (0.12, 10.65) | 0.931 |
|                        | Ethiopia_H37 Rv like | 14        | 8         | 1.39 (0.17, 11.49) | 0.760 |
|                        | Delhi/CAS            | 25        | 11        | 3.49 (0.48, 25.66) | 0.219 |
|                        | Beijing              | 4         | 0         | NA                 | NA    |
|                        | LAM                  | 2         | 5         | 0.10 (0.01, 1.48)  | 0.094 |
|                        | Haarlem              | 0         | 8         | NA                 | NA    |
|                        | X-type               | 0         | 4         | NA                 | NA    |
|                        | EAI                  | 4         | 2         | 3.26 (0.19, 55.52) | 0.414 |
|                        | Ugandall             | 0         | 1         | NA                 | NA    |
|                        | URAL                 | 0         | 2         | NA                 | NA    |
|                        | Not defined          | 5         | 4         | 1                  |       |

292 \*Percentage is calculated from row total

293           There was no a statistically significant difference in the proportion of clustered  
294 strains between university students and local community ( $p=0.142$ ) (Table 1). With regard  
295 to the university cohort, 18/34 (52.9%) patients were part of a molecular cluster. 17 (94%)  
296 lived in an area at least 400 km away prior to attending university. There were two  
297 clusters with multiple student cases. One cluster contained three students, all of whom  
298 were attending Haramaya University. Two of the three students shared a common area  
299 of study, but none were living in the same dormitory or building. The other cluster  
300 contained five student cases, with three of the students attending Haramaya University  
301 and the other two attending Jigjiga and Dire Dawa Universities, respectively. None of the  
302 students in this cluster shared a clear epidemiologic link. Of the eight students clustered  
303 with other student cases, six (75%) reported recent exposure to someone with a cough,  
304 but none had a known exposure to an active TB case on campus. The RTI among  
305 students was 17.6% (Table 3).

306

### 307 **Patterns of *M. tuberculosis* drug resistance**

308           Forty-eight (30%) of the study participants were resistant to one or more first line  
309 anti TB drugs. Among the first line anti-TB drugs examined, resistance to streptomycin  
310 and isoniazid was most common at 15%, and 13.1%, respectively. Rates of resistance  
311 to at least one first line anti-TB drug were similar in students and the community (32.4%  
312 vs 29.4%,  $p=0.734$ ) (Table 2). Few participants had multidrug resistant (MDR) TB, with  
313 three cases occurring in community members (infected with Ethiopia\_3, Ethiopia H37 Rv  
314 like, and LAM strain, respectively) and none occurring among university students.

315 Ethiopia\_3 strains were observed with a higher proportion (9.4%) of resistance to at least  
 316 one first-line drug compared to other MTBC genotypes (Table 5).

317

318 Table 5. Patterns of drug resistance to first line anti-TB drugs by MTBC lineage eastern

319 Ethiopia, May 2016 to April 2017

| Lineage (N=160)           | STM<br>n (%)* | INH<br>n (%)* | RIF<br>n (%)* | EMB<br>n (%)* | Any<br>resistance<br>n (%)* | MDR<br>n (%)* |
|---------------------------|---------------|---------------|---------------|---------------|-----------------------------|---------------|
| Ethiopia_3 (48)           | 8 (5.0)       | 8 (5.0)       | 3 (1.9)       | 1 (0.6)       | 15 (9.4)                    | 1 (0.6)       |
| Ethiopia_4 (13)           | 3 (1.9)       | 1 (0.6)       | 1 (0.6)       | 4 (2.5)       | 6 (3.8)                     | 0             |
| Ethiopia_H37 Rv like (22) | 2 (1.3)       | 5 (3.1)       | 1 (0.6)       | 2 (1.3)       | 8 (5.0)                     | 1 (0.6)       |
| Delhi/CAS (36)            | 5 (3.1)       | 2 (1.3)       | 1 (0.6)       | 1 (0.6)       | 9 (5.6)                     | 0             |
| Beijing (4)               | 2             | 1             | 1             | 0             | 3                           | 0             |
| LAM (7)                   | 1 (0.6)       | 2 (1.3)       | 1 (0.6)       | 1 (0.6)       | 3 (1.9)                     | 1 (0.6)       |
| Haarlem (8)               | 0             | 0             | 0             | 0             | 0                           | 0             |
| X-type (4)                | 1             | 1             | 1             | 0             | 2                           | 0             |
| EAI (6)                   | 0             | 0             | 0             | 0             | 0                           | 0             |
| Ugandall (1)              | 0             | 0             | 0             | 0             | 0                           | 0             |
| URAL (2)                  | 0             | 0             | 0             | 0             | 0                           | 0             |
| Not defined (9)           | 2 (1.3)       | 1 (0.6)       | 0             | 0             | 2 (1.3)                     | 0             |
| Total                     | 24 (15.0)     | 21 (13.1)     | 9 (5.6)       | 9 (5.6)       | 48 (30.0)                   | 3 (1.9)       |

320 \*Percentage calculated from the total isolates (N) and for those lineages with more than  
321 5 strains; MDR: Multi Drug Resistance; n= number of resistance strains in the specific  
322 group.

323

324

325

326

327

328

329

330

331

332

333

334

335

336

## 337 Discussion

338 By using molecular MTBC strain typing (24-loci MIRU-VNTR typing and  
339 Spoligotyping) in combination with epidemiological investigations we point out the  
340 importance of MTBC Ethiopia\_3 strains in the context of recent transmission and drug  
341 resistance in Eastern Ethiopia. Cluster rates among students and other community  
342 members were similar (52.9% and 66.7%, respectively [ $P = 0.142$ ]) and all clusters with  
343 university cases had at least one case from the community cohort associated. Being  
344 aware of the limitations mediated by the small sample size and the cross-sectional  
345 sampling scheme, our data suggest that MTBC transmission is still a major public health  
346 concern in Eastern Ethiopia and is not limited to congregate living facilities, e.g.  
347 universities or prisons [\[22\]](#).

348 Most university students with active TB originated from areas at least 400 km from  
349 the university campuses which might well be the source of the MTBC infection of non-  
350 clustered cases. Given the high cluster rate and the links to TB cases in the local  
351 community also suggests a significant proportion of active TB disease among students is  
352 due to transmission either on campus or in surrounding areas. Students within a  
353 molecular cluster were not observed with a direct epidemiologic link, indicating rather  
354 random short-term exposures as source of infection. These findings indicate that TB-  
355 transmission is not within university campuses but is rather a community associated  
356 phenomenon. Larger scale molecular surveillance of MTBC strains in the region may be  
357 required to comprehensively characterize community transmission dynamics and design  
358 the most impactful interventions to interrupt transmission.

359 Molecular clusters defined by the applied genotyping methods are a surrogate  
360 marker for recent transmission and epidemiological linked cases [23]. The high clustering  
361 rate of 63.8% in this study indeed indicates that the majority of active TB cases in Eastern  
362 Ethiopia are due to recent transmission and not reactivation. Studies from other parts of  
363 the world, including South Tawara, Kiribat [24], have shown an even higher clustering  
364 rate of 75.3%. Although there were no previous studies conducted in eastern Ethiopia  
365 using the standard combined application of 24 loci MIRU/VNTR and Spoligotyping  
366 methods, a study from Northwestern Ethiopia demonstrated a clustering rate of 45.1%  
367 [10], differences might be explained by different living environments in the areas studied  
368 (e.g. rural vs. metropolitan setting) or other demographic differences (e.g. age, gender)  
369 [22].

370 Here, multivariable analysis demonstrated several demographic and clinical  
371 factors were associated with clustering. Females were about 7 times more likely than  
372 males to be a part of a cluster. This finding is similar to previous studies from Ethiopia  
373 [25] and Botswana [26] and could be linked to an increased tendency of females spending  
374 more time in close contact with their relatives in social sittings like market places  
375 compared to males. Urban residents were more than four times more likely part of a  
376 cluster, compared to their rural counterparts, which could be a result of the dense living  
377 conditions in cities. However, the burden of tuberculosis was higher among rural  
378 residents, which may reflect higher rates of poverty and less access to health care among  
379 the rural population.

380 Univariate analysis showed that strains with resistance to at least one FLD were  
381 more likely to be part of a cluster and were strongly associated with the Ethiopia\_3

382 genotype. This is consistent with previous findings that even mono-resistant isolates may  
383 demonstrate selective pressure for MTBC transmission in Ethiopia [10, 27]. Similar to  
384 previous studies in Eastern Ethiopia [29], the prevalence of MDR TB was low. As recent  
385 data from South Africa suggests person-to-person transmission of drug resistant MTBC  
386 strains is the primary mechanism for the propagation of drug resistance, it will be  
387 important to improve public health programs to minimize transmission of these isolates  
388 [28].

389         The predominant MTBC lineages in this study were lineage 4 followed by lineage-  
390 3; findings that are similar to other studies conducted in Ethiopia [10, 19, 22]. We also  
391 demonstrate that local sub-lineages such as the newly described “Ethiopia\_4” and the  
392 closely related to Ethiopia\_3 (both part of lineage 4 and related to TUR genotype strains)  
393 dominate among Ethiopian TB cases but do not play a major role in the global TB  
394 epidemic. This might be another example of a specialized, locally adapted MTBC strain  
395 type as recently suggested by Stucki and colleagues for the lineage 4 strains [30].  
396 However, it is also important to note that strains with the Ethiopia H37Rv-like genotype  
397 can be found in many other world regions [24, 31, 32], and shares a common ancestor  
398 with the H37Rv laboratory reference strains (MTBC lineage 4.7, 4.8, and 4.9 according  
399 to Coll and his colleagues [33]).

400         Strains from the Ethiopia\_3 sub-lineage were more likely to be part of a cluster,  
401 indicating active transmission in the study area; an observation that was also found in  
402 Northwestern Ethiopia [10] and another study from Eastern Ethiopia [21]. The association  
403 between the Ethiopia\_3 genotype and resistance to at least one first line drug in our study  
404 might be one factor that contribute to the expansion of this strain type. This finding

405 highlights the need to conduct a large scale and more detailed characterization of the  
406 Ethiopia\_3 sub-lineage in Ethiopia. Studies conducted in Northern, Northwestern and  
407 Southwestern Ethiopia have found the Dehli/CAS to be the predominant sub-lineage [10,  
408 21, 27, 34], which may be attributable to these regions bordering Sudan, where Dehli/CAS  
409 was the most prevalent MTBC genotype [35]. All active TB cases caused by the Beijing  
410 strain, which is associated with high virulence, multidrug resistance and increased  
411 mortality [36], originated from the Dire Dawa community, which also supports the need to  
412 monitor the disease in the region. This study did not reveal any lineage-7 isolates (also  
413 referred to as “Ethiopia\_1” in previous studies [10, 21]), which is in agreement with  
414 previous work demonstrating the predominance of lineage-7 in the northern part of the  
415 country [37].

416 This study is subject to several limitations. Our study in the local community  
417 included only smear positive PTB cases who have access to and visited the study hospital  
418 laboratories, which may not be representative of all active TB cases in the region. While  
419 our study is the first to provide insight about how TB is transmitted among persons  
420 attending university in eastern Ethiopia, the number of isolates from university students  
421 available for genotyping was small, limiting the ability to draw definitive conclusions about  
422 TB transmission.

423

424

425

426



## 427 **Conclusion**

428           This study suggests TB-transmission in Ethiopia still is a major public health  
429 concern, and that transmission among college students is not limited to the university  
430 settings but also occurs in the general community. While the burden of MDR-TB in eastern  
431 Ethiopia remains low, we present evidence that the sub-lineage Ethiopia\_3 is linked to  
432 recent TB transmission and also associated with resistance to at least one first-line drug.  
433 Country-wide comprehensive molecular surveillance and DST profiling of MTBC strains  
434 may be useful to guide ongoing and future TB control programs.

## 435 **Supporting Information**

436 **S1 Fig.** Neighbor joining (NJ) phylogenetic tree based on 24 loci MIRU-VNTR profiles  
437 of 160 MTBC isolates from eastern Ethiopia (PDF) in relation to the MTBC reference  
438 collection hosted on [miru-vntrplus.org](http://miru-vntrplus.org).

## 439 **Acknowledgements**

440           We would like to express our appreciation to the administrations of the respective  
441 universities and hospitals where the study was conducted. We thank all study participants  
442 and data collectors of the study. We are grateful to Harari Health Research and Regional  
443 Laboratory and Ethiopian Public Health Institute for their lab facility support. We  
444 acknowledge Anja Lüdemann, Tanja Struve-Sonnenschein, and Tanja Ubben for their  
445 support in MIRU-VNTR typing and Spoligotyping. We appreciate all-rounded support from  
446 department of Microbial, Cellular and Molecular Biology, Addis Ababa University.

447           **Funding:** This work was supported in part by the NIH/Fogarty International  
448 Center Global Infectious Diseases Grant D43TW009127 and NIH grants T32 AI074492

449 and UL1 TR002378 (Georgia Clinical and Translational Science Alliance). Also, the  
450 United States Agency for International Development, through USAID Challenge TB,  
451 financially supports this study under the terms of Agreement No. AID-OAA-A-14-00029,  
452 by the 3rd round grant of TB Research Advisory Committee (TRAC) and KNCV  
453 Tuberculosis Foundation, Ethiopia. The funders had no role in study design, data  
454 collection and analysis, decision to publish, or preparation of the manuscript.

455 **Authors contribution:** AM conceived and designed the study. AM, BP,  
456 JC, GA and AA reviewed the proposal, contributed to the experiment, analysis and  
457 interpretation of the data, as well as the composition of this manuscript. AM, MM and SN  
458 participated in cluster analysis, strain classification, interpretation of the results and  
459 reviewed the initial and final manuscript. AM and DA participated in Drug Sensitivity  
460 Testing, interpretation of results and reviewed the manuscript. All authors read and  
461 approved the final manuscript.

462

463

464

465

466

467

468

## 469 **References**

- 470 1. Palomino J. Molecular detection, identification and drug resistance detection in  
471 *Mycobacterium tuberculosis*. FEMS Immunol Med Microbiol. 2009;56(2):103-11.
- 472 2. Global tuberculosis report 2017. Geneva: World Health Organization; 2017.
- 473 3. World Health Organization. Ethiopia: on the road to ending tuberculosis. [http://](http://www.who.int/features/2016/ethiopia-tuberculosis/en/)  
474 [www.who.int/features/2016/ethiopia-tuberculosis/en/](http://www.who.int/features/2016/ethiopia-tuberculosis/en/)
- 475 4. Reves R and Angelo S. As Ethiopia moves toward tuberculosis elimination, success  
476 requires higher investment. Washington: Center for Strategic & International  
477 Studies; 2016. Available at [https://csis-prod.s3.amazonaws.com/](https://csis-prod.s3.amazonaws.com/s3fspublic/legacy_files/files/publication/160229_Reves_EthiopiaMovesTowardTB_Web.pdf)  
478 [s3fspublic/legacy\\_files/files/publication/160229\\_Reves\\_](https://csis-prod.s3.amazonaws.com/s3fspublic/legacy_files/files/publication/160229_Reves_EthiopiaMovesTowardTB_Web.pdf)  
479 [EthiopiaMovesTowardTB\\_Web.pdf](https://csis-prod.s3.amazonaws.com/s3fspublic/legacy_files/files/publication/160229_Reves_EthiopiaMovesTowardTB_Web.pdf)
- 480 5. Firdessa R, Berg S, Hailu E, Schelling E, Gumi B, Erenso G, et al. Mycobacterial  
481 lineages causing pulmonary and extrapulmonary tuberculosis, Ethiopia. Emerg  
482 Infect Dis. 2013; 19: 460±3. [https://doi.org/ 10.3201/eid1903.120256](https://doi.org/10.3201/eid1903.120256) PMID:  
483 23622814
- 484 6. Niemann S and Supply P. Diversity and evolution of *Mycobacterium tuberculosis*:  
485 moving to whole-genome-based approaches. Cold Spring Harb Perspect Med.  
486 2014;4:a021188. doi:10.1101/cshperspect.a021188.
- 487 7. Fauville-Dufaux M and Supply P. Three-year population-based evaluation of  
488 standardize mycobacterial interspersed repetitive-unit-variable-number tandem-  
489 repeat typing of *Mycobacterium tuberculosis*. J Clin Microbiol. 2008; 46(4):1398–  
490 406. doi: 10.1128/JCM.02089-07 PMID: 18234864

- 491 8. Thwaites G, Caws M, Chau T, D'Sa A, Lan N, Huyen M, et al. Relationship between  
492 Mycobacterium tuberculosis genotype and the clinical phenotype of pulmonary  
493 and meningeal tuberculosis. J Clin Microbiol. 2008; 46: 1363±8.  
494 <https://doi.org/10.1128/JCM.02180-07> PMID: 18287322
- 495 9. Mekonnen A and Petros B. Burden of tuberculosis among students in two Ethiopian  
496 universities. EMJ. 2016;54 (4):189–196.
- 497 10. Tessema B, Beer J, Merker M, Emmrich F, Sack U, Rodloff AC, et al. Molecular  
498 epidemiology and transmission dynamics of Mycobacterium tuberculosis in  
499 Northwest Ethiopia: new phylogenetic lineages found in Northwest Ethiopia. BMC  
500 Infect Dis. 2013;13:131
- 501 11. Affolabi D, Anyo G, Faihun F, Sanoussi N, Shamputa I, et al. First molecular  
502 epidemiological study of Mycobacterium tuberculosis in Benin. Int J Tuberc Lung  
503 Dis. 2009; 13:317–322.
- 504 12. Central Statistical Agency (Ethiopia). Population Projection of Ethiopia for All  
505 Regions at Wereda Level from 2014–2017. Federal Democratic Republic of  
506 Ethiopia Central Statistical Agency, Addis Ababa, Ethiopia. 2013.  
507 [http://www.csa.gov.et/images/general/news/pop\\_pro\\_wer\\_2014–2017](http://www.csa.gov.et/images/general/news/pop_pro_wer_2014–2017)
- 508 13. Maher D, Grzemska M, Coninx R, and Reyes H. Guidelines for the control of  
509 tuberculosis in prisons. Geneva: World Health Organization. 1998.  
510 [http://whqlibdoc.who.int/hq/1998/WHO\\_TB\\_98.250.pdf](http://whqlibdoc.who.int/hq/1998/WHO_TB_98.250.pdf)
- 511 14. Salm H Saddiqi and Sabine Rüsç-Gerdes Mycobacteria Growth Indicator Tube  
512 (MGIT) Culture and Drug Susceptibility Demonstration Projects, 2006 MGIT™

- 513 procedure manual for Bactech™ and MGIT 960™ TB system available at  
514 [http://www.finddx.org/wp-](http://www.finddx.org/wp-content/uploads/2016/02/mgit_manual_nov2006.pdf) content/uploads/2016/02/mgit\_manual\_nov2006.pdf.
- 515 15. Kamerbeek J, Schouls L, Kolk A, van Agterveld M, van Soolingen D, Kuijper S, et al.  
516 Simultaneous detection and strain differentiation of *Mycobacterium tuberculosis*  
517 for diagnosis and epidemiology. *J Clin Microbiol.* 1997;35:907–14.
- 518 16. Supply P, Allix C, Lesjean S, Cardoso-Oelemann M, Rüsçh-Gerdes S, et al. Proposal  
519 for standardization of optimized mycobacterial interspersed repetitive unit-  
520 variable-number tandem repeat typing of *Mycobacterium tuberculosis*. *J Clin*  
521 *Microbiol.* 2006;44:498–510.
- 522 17. Dou H, Tseng F, Lin C, Chang J, Sun J, Tsai W, et al. Molecular epidemiology and  
523 evolutionary genetics of *Mycobacterium tuberculosis* in Taipei. *BMC Infect Dis.*  
524 2008;8:170. doi:10.1186/1471-2334-8-170.
- 525 19. Weniger T, Krawczyk J, Supply P, Niemann S and Harmsen D. MIRU-VNTRplus: a  
526 web tool for polyphasic genotyping of *Mycobacterium tuberculosis* complex  
527 bacteria. *Nucleic Acids Res.* 2010;38:W326–31. doi:10.1093/nar/gkq351.
- 528 19. Barletta F, Otero L, Jong B, Iwamoto T, Arikawa K, Van der Stuyft P, et al.  
529 Predominant *Mycobacterium tuberculosis* families and high rates of recent  
530 transmission among new cases are not associated with primary multidrug  
531 resistance in Lima. *J Clin Microbiol.* 2015;53:1854–63.
- 532 20. He Z, Zhang H, Gao S, Lercher M, Chen W and Hu S. Evolveview v2: an online  
533 visualization and management tool for customized and annotated phylogenetic  
534 trees. *Nucleic Acids Research.* 2016; 44 doi: 10.1093/nar/gkw370

- 535 21. Biadlegne F, Merker M, Sack U, Rodloff A, and Niemann S. Tuberculous  
536 lymphadenitis in Ethiopia predominantly caused by strains belonging to the  
537 Delhi/CAS lineage and newly identified Ethiopian clades of the mycobacterium  
538 tuberculosis complex. PLoS One. 2015;10(9).
- 539 22. Ali S, Beckert P, Haileamlak A, Wieser A, Pritsch M, Heinrich N, et al. Drug resistance  
540 and population structure of *M. tuberculosis* isolates from prisons and communities  
541 in Ethiopia. BMC Infect Dis. 2016;16(1):687.
- 542 23. Chevrel-dellagi D, Abderrahman A, Haltiti R, Koubaji H, Gicquel B and Dellagi K.  
543 Large-scale DNA fingerprinting of mycobacterium tuberculosis strains as a tool  
544 for epidemiological studies of tuberculosis. J Clin Microbiol. 1993;31:2446–  
545 50.
- 546 24. Aleksic E, Merker M, Cox H, Reiher B, Sekawi Z, Hearps A, et al. First Molecular  
547 Epidemiology Study of Mycobacterium tuberculosis in Kiribati. PLoSONE.  
548 2013;8:e55423.
- 549 25. Bruchfeld J, Aderaye G, Palme IB, Bjorvatn B, and Ghebremichael S. Molecular  
550 epidemiology and drug resistance of Mycobacterium tuberculosis isolates from  
551 Ethiopian pulmonary tuberculosis patients with and without human  
552 immunodeficiency virus infection. J Clin Microbiol. 2002;40:1636–1640.
- 553 26. Lockman S, Sheppard J, Braden C, Mwasekaga M, Woodley C, Kenyon T, et al.  
554 Molecular and conventional epidemiology of *Mycobacterium tuberculosis* in  
555 Botswana: a population-based prospective study of 301 pulmonary tuberculosis  
556 patients. J. Clin. Microbiol. 2001;39:1042–1047.

- 557 27. Yimer S, Norheim G, Namouchi A, Zegeye E, Kinander W, Tønjum T, et al.  
558 *Mycobacterium tuberculosis* lineage 7 strains are associated with prolonged  
559 patient delay in seeking treatment for pulmonary tuberculosis in Amhara Region,  
560 Ethiopia. *J Clin Microbiol.* 2015;53:1301–9.
- 561 28. Shah N, Auld S, Brust J, Mathema B, Ismail N, Moodley P, et al. Transmission of  
562 Extensively Drug-Resistant Tuberculosis in South Africa. *N ENGL J MED.* 2017;  
563 376;3 DOI: 10.1056/NEJMoa1604544
- 564 29. Seyoum B, Demissie M, Worku A, Bekele S, and Aseffa A. Prevalence and Drug  
565 Resistance Patterns of *Mycobacterium tuberculosis* among New Smear  
566 Positive Pulmonary Tuberculosis Patients in Eastern Ethiopia. Hindawi  
567 Publishing Corporation. *Tuberculosis Research and Treatment* 2014; Volume  
568 2014, Article ID 753492, 7 pages <http://dx.doi.org/10.1155/2014/753492>
- 569 30. Stucki D, Brites D, Jeljeli L, Coscolla M, Liu Q, Trauner A et al. *Mycobacterium*  
570 *tuberculosis* Lineage 4 comprises globally distributed and geographically  
571 restricted sublineages. *Nat Genet.* 2016; 48(12): 1535–1543.
- 572 31. Malm S, Linguissi LS, Tekwu EM, Vouvoungui JC, Kohl TA, Beckert P et al. New  
573 *Mycobacterium tuberculosis* Complex Sublineage, Brazzaville, Congo. *Emerg*  
574 *Infect Dis.* 2017;23(3): 423-429.
- 575 32. Niemann S, Diel R, Khechinashvili G, Gegia M, Mdivani N and Tang YW.  
576 *Mycobacterium tuberculosis* Beijing Lineage Favors the Spread of Multidrug-  
577 Resistant Tuberculosis in the Republic of Georgia. *J. Clin. Microbiol.*  
578 2010;48(10): 3544– 3550.

- 579 33. Coll F, McNerney R, Guerra-Assunção JA, Glynn JR, Perdigão J, Viveiros M et al. A  
580 robust SNP barcode for typing Mycobacterium tuberculosis complex strains. Nat.  
581 Commun. 2014; 5:4812. doi: 10.1038/ncomms5812 (2014).
- 582 34. Tadesse M, Abebe G, Bekele A, Bezabih M, Rijk P and Meehan C. The predominance  
583 of Ethiopian specific Mycobacterium tuberculosis families and minimal contribution  
584 of Mycobacterium bovis in tuberculous lymphadenitis patients in Southwest  
585 Ethiopia, Infection, Genetics and Evolution. 2017;  
586 doi:10.1016/j.meegid.2017.09.016
- 587 35. Sharaf-Eldin G, Fadi-Elmula I, Ali M, Ali A and Salih A. Tuberculosis in Sudan: a  
588 study of *Mycobacterium tuberculosis* strain genotype and susceptibility to anti-  
589 tuberculosis drugs. BMC Infect Dis. 2011;11:219.
- 590 36. Parwati I, Crevel R and Soolingen D. Possible underlying mechanisms for  
591 successful emergence of the Mycobacterium tuberculosis Beijing genotype  
592 strains. Lancet Infect Dis. 2010; 10: 103–11.
- 593 37. Comas I, Elina H, Teklu K, Shiferaw B, Wondale M, Balako G, et al. Population  
594 genomics of Mycobacterium tuberculosis in Ethiopia contradicts the virgin soil  
595 hypothesis for human tuberculosis in sub-Saharan Africa. Curr.Biol. 2015;25,  
596 3260– 3266.
- 597
- 598
- 599



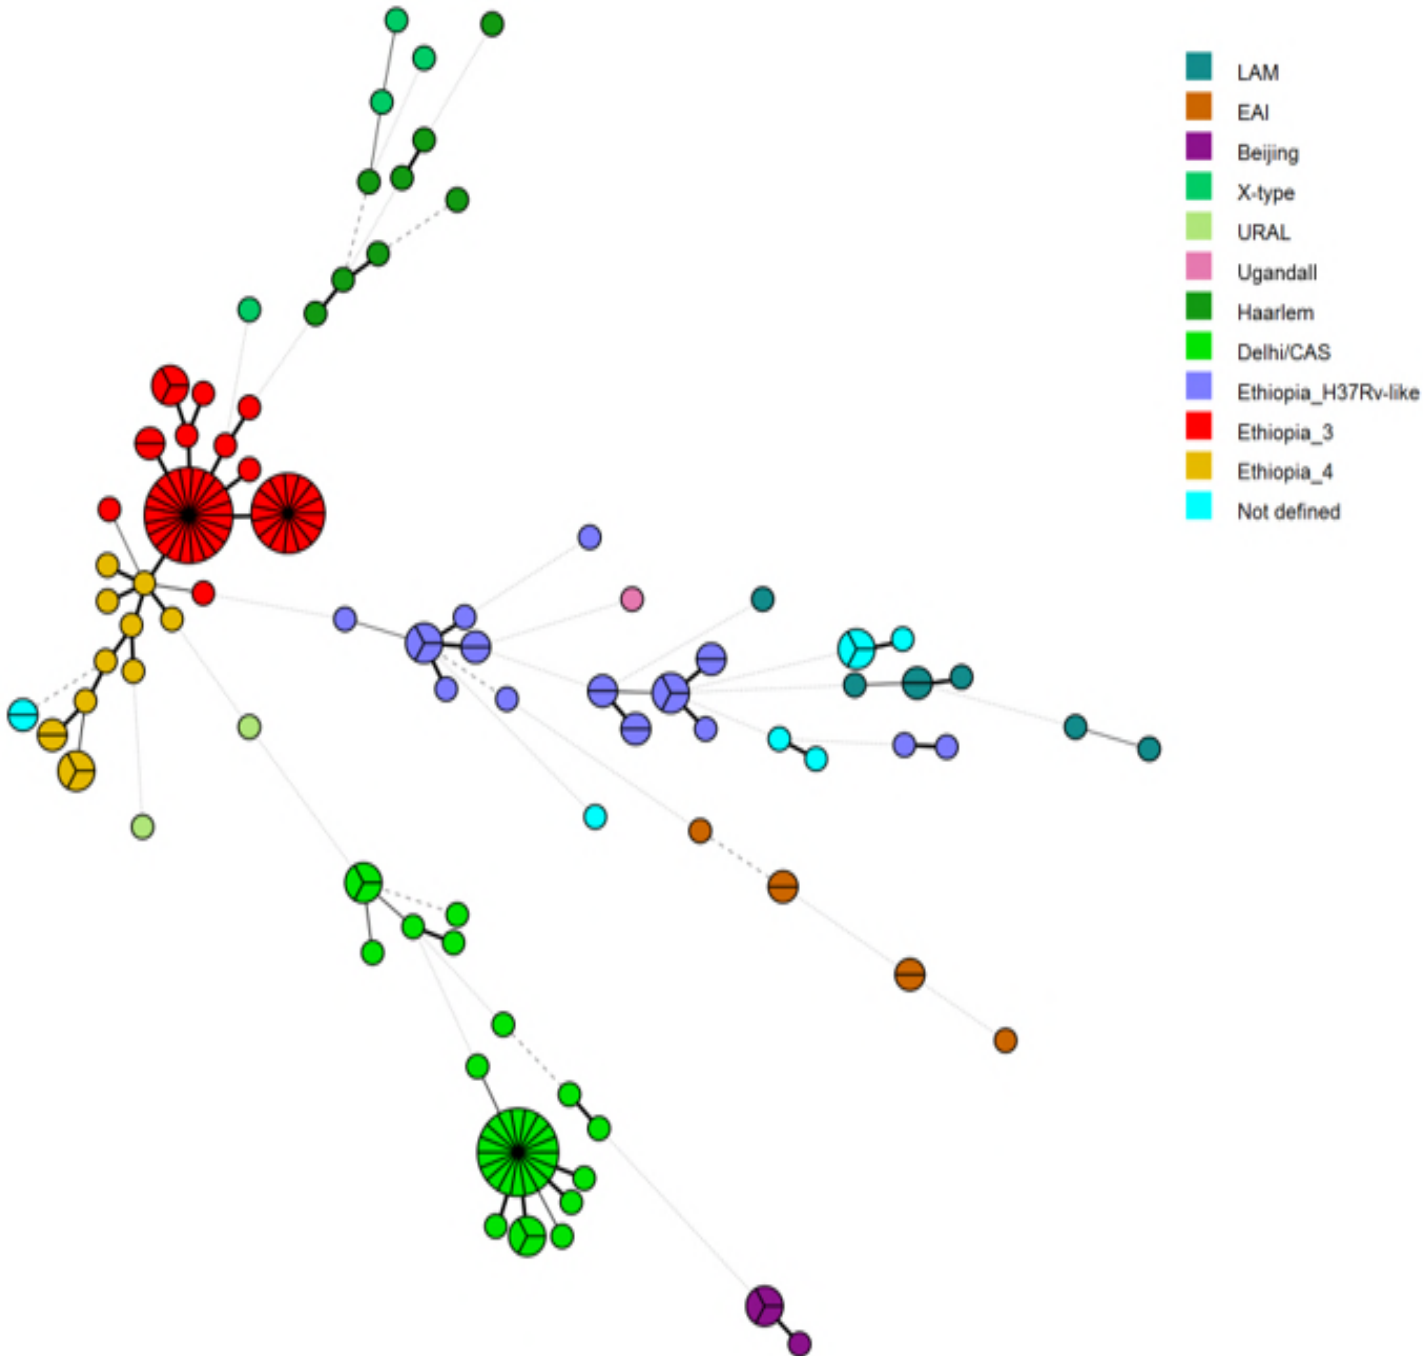

Fig 1. Minimum spanning tree based on MIRU/VNTR profiles of 24- loci of 160 MTBC isolates in eastern Ethiopia. A circle representing a specific genotype is divided in to the number of strains clustering in it. EAI: East Africa India, LAM=M. tuberculosis Latin American Mediterranean.

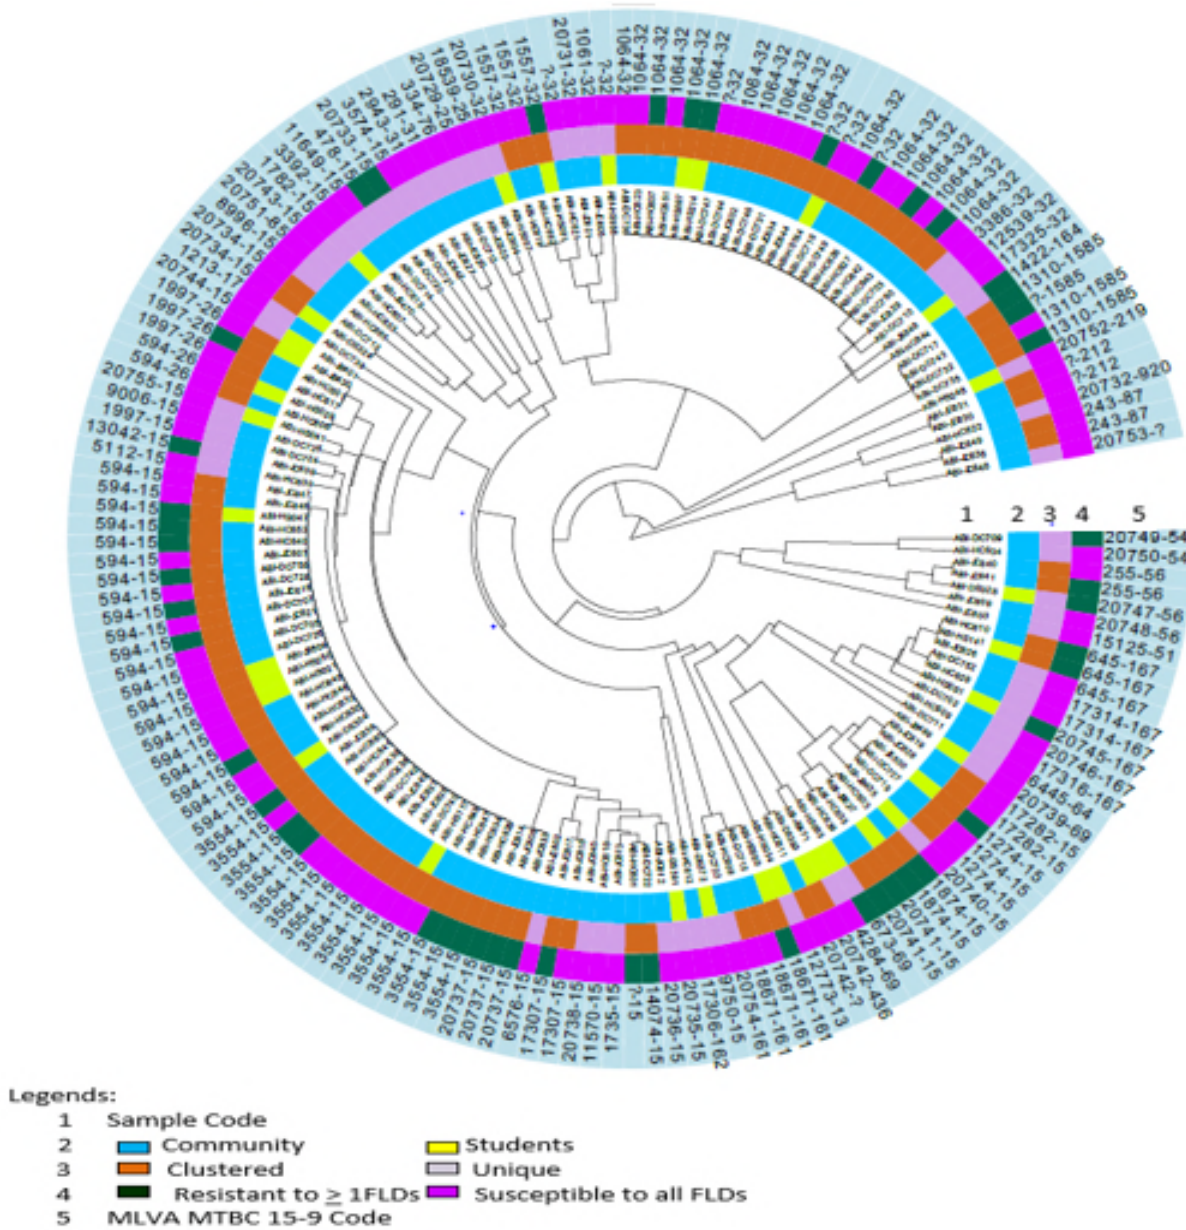

Fig 2. Radial UPGMA tree based on MIRU/VNTR 24-loci copy number. patient origin (Community or student), Clustering, Resistance to one or more FLDs (First line Anti TB drugs), and MLVA MTBC 15-9 Code.
